# Supplementary material for: Novel Protective Role of Myeloid Differentiation 1 in Pathological Cardiac Remodelling
Source: PubMed Central journal article supplement (PMC5292962; doi:10.1038/srep41857), 2017-02-06
Supplement: srep41857-s1.pdf [file srep41857-s1.pdf]

# Novel Protective Role of Myeloid Differentiation 1 in Pathological Cardiac Remodelling

Xiaojv Xiong<sup>1,2,3</sup>, Yu Liu<sup>1,2,3</sup>, Yang Mei<sup>1,2,3</sup>, Jianye Peng<sup>1,2,3</sup>, Zhiqiang Wang<sup>1,2,3</sup>,  
Bin Kong<sup>1,2,3</sup>, Peng Zhong<sup>1,2,3</sup>, Liang Xiong<sup>1,2,3</sup>, Dajun Quan<sup>1,2,3</sup>, Qi Li<sup>1,2,3</sup>,  
Guangji Wang<sup>1,2,3</sup>, He Huang<sup>1,2,3\*</sup>

<sup>1</sup>

Department of Cardiology, Renmin Hospital of Wuhan University, Wuhan, Hubei Province, PR China

<sup>2</sup>

Cardiovascular Research Institute of Wuhan University, Wuhan, Hubei Province, PR China

<sup>3</sup>

Hubei Key Laboratory of Cardiology, Wuhan 430060, Hubei Province, PR China;

**\*Xiaojv Xiong and Yu Liu are co-first authors**

**Correspondence to**

**He Huang, MD**

Department of Cardiology, Renmin Hospital of Wuhan University

Cardiovascular Research Institute, Wuhan University,

Hubei Key Laboratory of Cardiology,

Jiefang Road 238, Wuhan 430060, PR China.

Tel/fax: +86 27 88042922.

E-mail: [huanghe1978@hotmail.com](mailto:huanghe1978@hotmail.com)

## Supplemental Figures

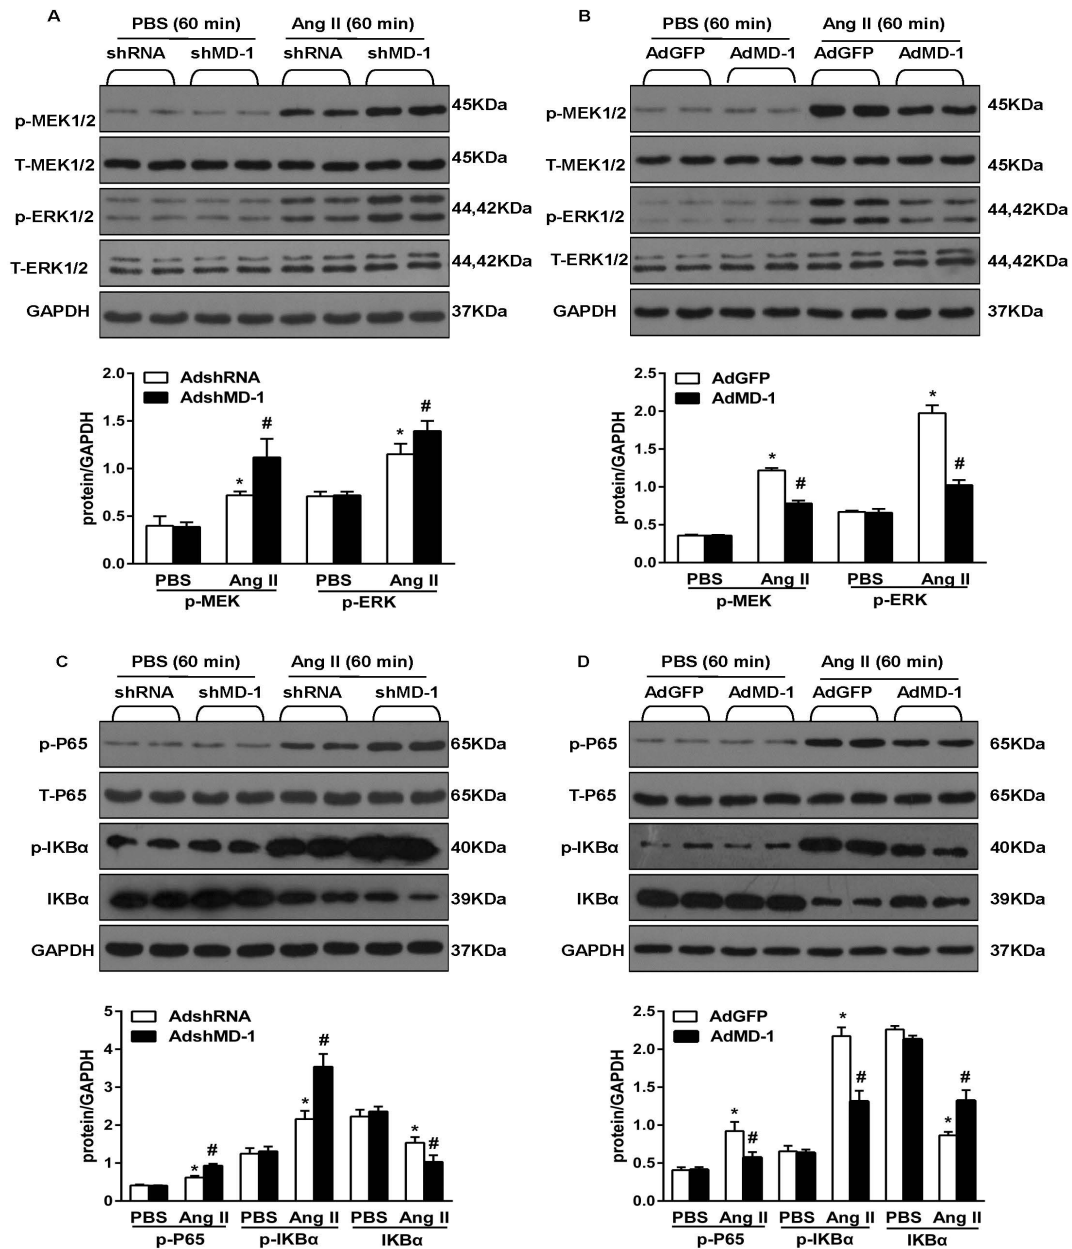

**Figure S1 Effects of MD-1 on MEK-ERK1/2 and NF- $\kappa$ B signalling pathways in vitro.** (A, C) Representative blots and results of quantitative analysis of the phosphorylated and total protein levels of MEK1/2, ERK1/2, P65 and I $\kappa$ B  $\alpha$  following infection with AdshMD-1 and treatment with PBS or Ang II (n=4). \*P<0.05 vs. AdshRNA/PBS; #P<0.05 vs. AdshRNA/Ang II. (B, D) Representative blots and results of quantitative analysis of the phosphorylated and total protein levels of MEK1/2, ERK1/2, P65 and I $\kappa$ B  $\alpha$  following infection with AdMD-1 in response to PBS or Ang II (n=4). \*P<0.05 vs. AdGFP/PBS; #P<0.05 vs. AdGFP/Ang II. GAPDH was used as a loading control.

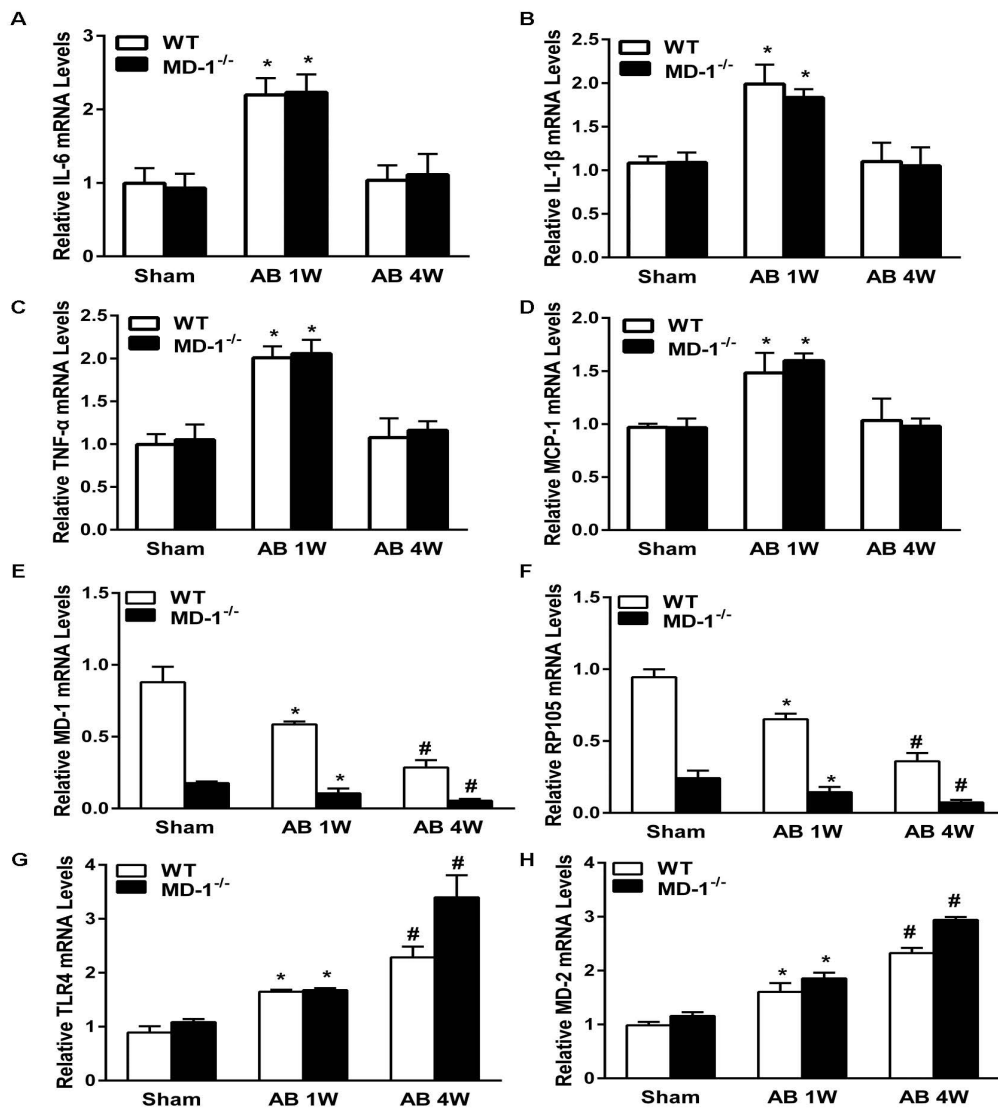

**Figure S2 Effects of MD-1 on mRNA levels of inflammatory cytokines, TLR4-MD2 and RP105-MD1 in WT vs. MD-1 KO hearts at week1 and at week4 after AB. (A-D) Relative (A) IL-6, (B) IL-1  $\beta$ , (C) TNF- $\alpha$ , and (D) MCP-1 mRNA levels in samples obtained from WT and MD-1<sup>-/-</sup> mice (n=4). (E-H) Relative (E) MD-1, (F) RP105, (G) TLR4, and (H) MD-2 mRNA levels in samples obtained from WT and MD-1<sup>-/-</sup> mice (n=4). \*P < 0.05 vs. WT/shams; #P < 0.05 vs. AB 1W.**
